# Supplementary material
Source: publisher figshare collection journal article supplement (https://acs.figshare.com/ndownloader/files/4162846)
Supplement: Supplementary file 1 [file 4162846]

Electrical resistivity of assembled transparent  
inorganic oxide nanoparticle thin layers:  
Influence of silica, insulating impurities and  
surfactant layer thickness

*Stephanie B. Bubenhofer<sup>a</sup>, Christoph M. Schumacher<sup>a</sup>, Fabian M. Koehler<sup>a</sup>, Norman A.  
Luechinger<sup>a</sup>, Georgios A. Sotiriou<sup>b</sup>, Robert N. Grass<sup>a</sup>, and Wendelin J. Stark<sup>a\*</sup>*

<sup>a</sup> Functional Materials Laboratory, Institute for Chemical and Bioengineering, ETH  
Zurich, CH-8093 Zurich, Switzerland

<sup>b</sup> Particle Technology Laboratory, Institute of Process Engineering, ETH Zurich, CH-  
8092 Zurich, Switzerland

\*E-Mail: [wendelin.stark@chem.ethz.ch](mailto:wendelin.stark@chem.ethz.ch)

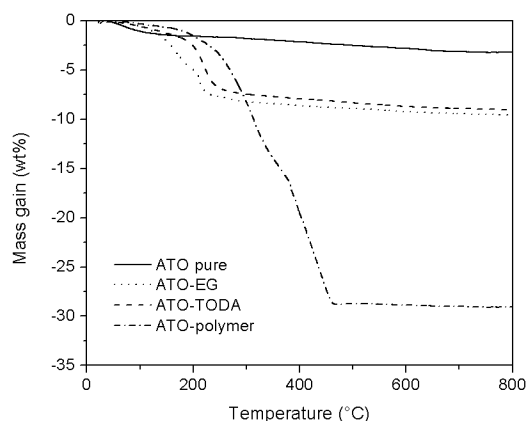

**Supporting Figure 1:** Thermogravimetric analysis of organically functionalized ATO nanoparticles (dried state). A mass loss of about 30 wt% is observed for the polymer coated ATO at high temperatures and less than 10 wt% for EG and TODA shells.

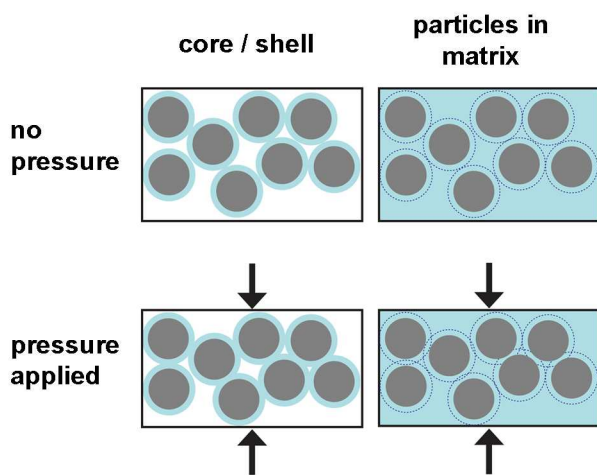

**Supporting Figure 2:** Two models are shown to explain the structure of polymer coated ATO pills. Either a core/shell like structure can be assumed, where the total amount of polymer is coated around the ATO cores, or the composite can be described by a polymer matrix with embedded ATO particles. In the latter structure the mean distance corresponds to two times an imaginary shell thickness.

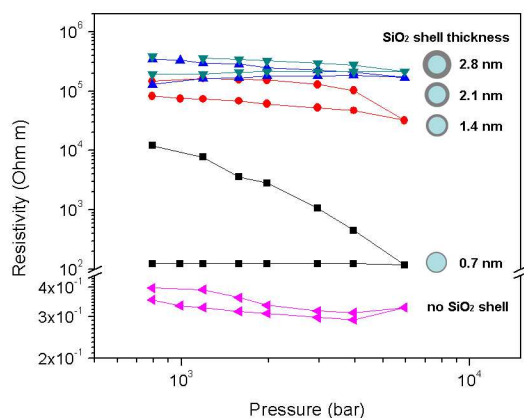

**Supporting Figure 3:** Pressure dependent resistivity measurements are shown for ATO coated with different shell thicknesses of SiO<sub>2</sub> and the uncoated SiO<sub>2</sub>, prepared on the same FSP-setup.

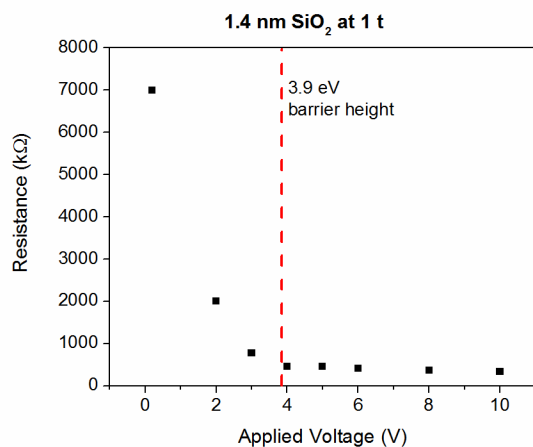

**Supporting Figure 4:** The resistance of 1.4 nm SiO<sub>2</sub> coated ATO nanoparticles were measured under 1 t pressure at different applied voltages. A strong decrease in resistance can be observed when the applied voltage is approaching the barrier height, and a nearly constant resistance is observed at voltages exceeding the barrier.
